# Supplementary material for: Differentiation of inflammatory stages: prepartum blood data patterns detect at least five inflammatory stages that differ in their birth-related adverse outcomes
Source: Research Square preprint supplement (doi:10.21203/rs.3.rs-6335868/v1), 2025-04-01
Supplement: Supplementary file 1 [file 441bd58075dae4a783cd9a35.docx]

| **ID**  **A** | **T**  **T**  **B** | **State**  **C** | **Double**  **riskD** | **TLC**  **E** | **N %F** | **M %G** | **L**  **%H** | **Ferritin I** | **CRP**  **J** | **Risk-**  **related classes**  **K** | **Final (five)**  **classes**  **L** |
| --- | --- | --- | --- | --- | --- | --- | --- | --- | --- | --- | --- |
| 1 | 2 | Delhi | No | 8.0 | 73.6 | 5.6 | 20.8 | 90.33 | 6.37 | D: 9.6% | D: 9.6% |
| 2 | 1 | Delhi | No | 4.0 | 60.4 | 1.0 | 38.5 | 43.50 | 1.90 | A: 0% | A1: 0% |
| 2 | 2 | Delhi | No | 12.4 | 62.5 | 1.0 | 36.5 | 39.38 | 2.76 | A: 0% | A1: 0% |
| 3 | 1 | Delhi | No | 8.9 | 77.1 | 8.3 | 14.6 | 37.96 | 6.59 | B: 0% | B: 0% |
| 3 | 2 | Delhi | No | 9.3 | 84.7 | 5.1 | 10.2 | 18.83 | 8.17 | D: 9.6% | D: 9.6% |
| 4 | 1 | Delhi | No | 6.7 | 70.8 | 3.1 | 26.0 | 27.25 | 3.42 | D: 9.6% | D: 9.6% |
| 5 | 2 | Delhi | No | 8.4 | 77.8 | 7.1 | 15.2 | 78.39 | 4.42 | D: 9.6% | D: 9.6% |
| 6 | 1 | Delhi | No | 7.4 | 67.7 | 1.0 | 31.3 | 25.35 | 4.63 | C: 3.3% | C: 3.3% |
| 6 | 2 | Delhi | No | 8.3 | 78.5 | 5.4 | 16.1 | 17.83 | 11.55 | D: 9.6% | D: 9.6% |
| 7 | 2 | Delhi | No | 15.0 | 81.8 | 4.0 | 14.1 | 13.30 | 2.88 | D: 9.6% | D: 9.6% |
| 8 | 1 | Delhi | No | 6.2 | 61.2 | 2.0 | 36.7 | 38.58 | 8.26 | A: 0% | A2: 0% |
| 8 | 2 | Delhi | No | 6.7 | 54.6 | 2.1 | 43.3 | 32.30 | 8.55 | D: 9.6% | D: 9.6% |
| 9 | 1 | Delhi | No | 10.9 | 74.0 | 5.0 | 21.0 | 18.67 | 3.25 | D: 9.6% | D: 9.6% |
| 9 | 2 | Delhi | No | 10.5 | 73.0 | 5.0 | 22.0 | 6.00 | 1.23 | D: 9.6% | D: 9.6% |
| 10 | 1 | Delhi | No | 13.4 | 71.1 | 7.2 | 21.6 | 67.00 | 6.34 | D: 9.6% | D: 9.6% |
| 10 | 2 | Delhi | No | 13.0 | 71.7 | 7.1 | 21.2 | 20.33 | 22.67 | D: 9.6% | D: 9.6% |
| 11 | 1 | Delhi | Yes | 10.1 | 75.0 | 6.3 | 18.8 | 22.00 | 3.96 | D: 9.6% | D: 9.6% |
| 12 | 1 | Delhi | Yes | 9.6 | 69.0 | 6.0 | 25.0 | 42.74 | 2.32 | D: 9.6% | D: 9.6% |
| 12 | 2 | Delhi | Yes | 9.1 | 71.7 | 6.1 | 22.2 | 56.67 | 8.84 | D: 9.6% | D: 9.6% |
| 13 | 1 | Delhi | No | 7.2 | 55.7 | 4.1 | 40.2 | 30.13 | 5.27 | D: 9.6% | D: 9.6% |
| 14 | 2 | Delhi | No | 8.6 | 73.0 | 7.0 | 20.0 | 7.67 | 7.29 | D: 9.6% | D: 9.6% |
| 15 | 1 | Delhi | No | 11.9 | 89.7 | 1.0 | 9.3 | 22.74 | 5.26 | B: 0% | B: 0% |
| 15 | 2 | Delhi | No | 9.2 | 76.5 | 6.1 | 17.3 | 27.67 | 2.00 | D: 9.6% | D: 9.6% |
| 16 | 2 | Delhi | No | 12.5 | 83.0 | 6.0 | 11.0 | 86.33 | 5.08 | B: 0% | B: 0% |
| 17 | 1 | Delhi | No | 7.7 | 72.8 | 5.4 | 21.7 | 67.00 | 49.75 | B: 0% | B: 0% |
| 17 | 2 | Delhi | No | 10.7 | 87.8 | 2.0 | 10.2 | 41.87 | 5.83 | D: 9.6% | D: 9.6% |
| 18 | 1 | Delhi | No | 10.9 | 73.5 | 1.0 | 25.5 | 34.50 | 1.98 | C: 3.3% | C: 3.3% |
| 19 | 1 | Delhi | No | 8.5 | 76.8 | 5.1 | 18.2 | 28.67 | 29.32 | D: 9.6% | D: 9.6% |
| 19 | 2 | Delhi | No | 9.5 | 78.8 | 5.1 | 16.2 | 20.33 | 44.05 | D: 9.6% | D: 9.6% |
| 20 | 1 | Delhi | No | 7.6 | 71.4 | 4.1 | 24.5 | 52.63 | 4.43 | D: 9.6% | D: 9.6% |
| 21 | 1 | Delhi | No | 6.6 | 65.0 | 2.0 | 33.0 | 47.50 | 6.18 | D: 9.6% | D: 9.6% |
| 22 | 1 | Delhi | No | 8.2 | 78.3 | 2.2 | 19.6 | * | * | C: 3.3% | C: 3.3% |
| 23 | 1 | Delhi | No | 7.8 | 66.7 | 5.1 | 28.3 | 46.75 | 1.92 | D: 9.6% | D: 9.6% |
| 23 | 2 | Delhi | No | 8.7 | 71.1 | 6.2 | 22.7 | 94.25 | 3.58 | D: 9.6% | D: 9.6% |
| 24 | 1 | Delhi | No | 9.4 | 61.7 | 7.4 | 30.9 | * | * | D: 9.6% | D: 9.6% |
| 25 | 1 | Delhi | No | 6.6 | 63.6 | 1.0 | 35.4 | * | * | A: 0% | A2: 0% |
| 25 | 2 | Delhi | No | 6.8 | 64.9 | 1.8 | 33.3 | * | * | A: 0% | A2: 0% |
| 26 | 1 | Delhi | No | 7.9 | 60.0 | 4.0 | 36.0 | 16.88 | 0.77 | D: 9.6% | D: 9.6% |
| 27 | 1 | Delhi | No | 9.6 | 67.0 | 2.1 | 30.9 | 31.75 | 3.75 | C: 3.3% | C: 3.3% |
| 28 | 2 | Delhi | No | 9.6 | 62.9 | 3.1 | 34.0 | 34.91 | 8.28 | A: 0% | A2: 0% |
| 29 | 2 | Delhi | No | 12.1 | 58.6 | 3.0 | 38.4 | 87.09 | 8.50 | D: 9.6% | D: 9.6% |

**Supplementary Data Table 1.** Complete blood cell counts and percentages of pregnant females, birth-related outcomes and inflammation-related data classes (n=192).

| **ID**  **A** | **TT**  **B** | **State**  **C** | **Double**  **riskD** | **TLC**  **E** | **N**  **%F** | **M %G** | **L**  **%H** | **Ferritin I** | **CRP**  **J** | **Risk-**  **related classes**  **K** | **Final (five)**  **classes**  **L** |
| --- | --- | --- | --- | --- | --- | --- | --- | --- | --- | --- | --- |
| 30 | 2 | Delhi | No | 12.0 | 80.6 | 4.1 | 15.3 | 56.22 | 23.92 | D: 9.6% | D: 9.6% |
| 31 | 1 | Delhi | No | 8.9 | 58.0 | 2.0 | 40.0 | 23.61 | 3.78 | A: 0% | A2: 0% |
| 32 | 1 | Delhi | No | 5.0 | 66.7 | 8.1 | 25.3 | 27.00 | 5.15 | A: 0% | A2: 0% |
| 32 | 2 | Delhi | No | 6.5 | 59.4 | 2.1 | 38.5 | 24.48 | 1.03 | D: 9.6% | D: 9.6% |
| 33 | 1 | Delhi | No | 7.1 | 76.5 | 5.1 | 18.4 | 21.87 | 6.99 | D: 9.6% | D: 9.6% |
| 34 | 2 | Delhi | No | 17.3 | 74.0 | 8.3 | 17.7 | 61.67 | 6.19 | D: 9.6% | D: 9.6% |
| 35 | 2 | Delhi | No | 13.1 | 83.0 | 5.0 | 12.0 | 47.67 | 4.99 | B: 0% | B: 0% |
| 36 | 1 | Delhi | No | 7.8 | 63.3 | 10.2 | 26.5 | 43.67 | 7.18 | C: 3.3% | C: 3.3% |
| 36 | 2 | Delhi | No | 8.4 | 81.1 | 0.9 | 17.9 | 24.48 | 2.84 | D: 9.6% | D: 9.6% |
| 37 | 1 | Delhi | No | 7.0 | 66.3 | 1.0 | 32.7 | 39.26 | 7.33 | A: 0% | A1: 0% |
| 37 | 2 | Delhi | No | 11.3 | 74.0 | 7.0 | 19.0 | 70.33 | 28.65 | D: 9.6% | D: 9.6% |
| 38 | 2 | Delhi | No | 10.6 | 65.6 | 3.1 | 31.3 | 67.00 | 7.39 | D: 9.6% | D: 9.6% |
| 39 | 1 | Delhi | Yes | 8.8 | 52.0 | 20.4 | 27.6 | 79.13 | 7.13 | C: 3.3% | C: 3.3% |
| 39 | 2 | Delhi | Yes | 9.7 | 68.0 | 1.0 | 30.9 | 47.13 | 4.27 | D: 9.6% | D: 9.6% |
| 40 | 2 | Delhi | No | 12.0 | 70.8 | 1.0 | 28.1 | 24.00 | 8.54 | C: 3.3% | C: 3.3% |
| 41 | 1 | Delhi | Yes | 13.5 | 76.6 | 1.1 | 22.3 | 30.57 | 4.75 | C: 3.3% | C: 3.3% |
| 42 | 1 | Delhi | No | 7.3 | 66.3 | 1.0 | 32.7 | 17.09 | 3.68 | A: 0% | A1: 0% |
| 42 | 2 | Delhi | No | 9.1 | 77.8 | 9.1 | 13.1 | 43.61 | 6.06 | B: 0% | B: 0% |
| 43 | 2 | Delhi | No | 9.1 | 76.5 | 7.1 | 16.3 | 26.65 | 12.94 | D: 9.6% | D: 9.6% |
| 44 | 1 | Delhi | No | 6.2 | 66.3 | 1.0 | 32.7 | 25.78 | 4.94 | C: 3.3% | C: 3.3% |
| 45 | 1 | Delhi | No | 9.8 | 66.7 | 1.1 | 32.3 | 27.96 | 3.89 | C: 3.3% | C: 3.3% |
| 45 | 2 | Delhi | No | 8.6 | 71.6 | 9.5 | 18.9 | 38.67 | 7.09 | D: 9.6% | D: 9.6% |
| 46 | 1 | Delhi | No | 5.3 | 54.1 | 1.0 | 44.9 | 21.00 | 5.05 | A: 0% | A1: 0% |
| 46 | 2 | Delhi | No | 8.7 | 71.1 | 7.2 | 21.6 | 47.09 | 11.19 | D: 9.6% | D: 9.6% |
| 47 | 1 | Delhi | No | 9.0 | 60.2 | 4.1 | 35.7 | 57.09 | 9.32 | D: 9.6% | D: 9.6% |
| 47 | 2 | Delhi | No | 11.7 | 75.5 | 9.2 | 15.3 | 84.04 | 16.51 | D: 9.6% | D: 9.6% |
| 48 | 1 | Delhi | No | 9.1 | 61.6 | 3.0 | 35.4 | 15.33 | 4.01 | D: 9.6% | D: 9.6% |
| 48 | 2 | Delhi | No | 10.4 | 81.0 | 4.0 | 15.0 | 45.78 | 8.05 | D: 9.6% | D: 9.6% |
| 49 | 2 | Delhi | Yes | 10.7 | 77.8 | 5.1 | 17.2 | 67.96 | 3.39 | D: 9.6% | D: 9.6% |
| 50 | 2 | Delhi | No | 12.0 | 74.7 | 8.1 | 17.2 | 92.00 | 18.74 | D: 9.6% | D: 9.6% |
| 51 | 2 | Delhi | No | 9.3 | 74.7 | 8.1 | 17.2 | 67.67 | 9.47 | D: 9.6% | D: 9.6% |
| 52 | 1 | Delhi | No | 8.0 | 67.0 | 2.1 | 30.9 | 26.75 | 7.77 | D: 9.6% | D: 9.6% |
| 52 | 2 | Delhi | No | 9.6 | 72.7 | 6.1 | 21.2 | 69.50 | 8.79 | D: 9.6% | D: 9.6% |
| 53 | 1 | Delhi | No | 10.6 | 88.8 | 2.0 | 9.2 | 18.00 | 6.42 | A: 0% | A1: 0% |
| 53 | 2 | Delhi | No | 11.3 | 59.0 | 1.0 | 40.0 | 53.67 | 1.09 | B: 0% | B: 0% |
| 54 | 1 | Delhi | No | 5.9 | 66.7 | 6.1 | 27.3 | 13.67 | 4.46 | D: 9.6% | D: 9.6% |
| 54 | 2 | Delhi | No | 10.0 | 81.8 | 4.0 | 14.1 | 56.22 | 8.06 | D: 9.6% | D: 9.6% |
| 55 | 2 | Delhi | No | 8.0 | 77.3 | 6.2 | 16.5 | 44.48 | 8.05 | D: 9.6% | D: 9.6% |
| 56 | 1 | Delhi | No | 7.7 | 72.2 | 1.1 | 26.7 | 50.33 | 8.73 | B: 0% | B: 0% |
| 56 | 2 | Delhi | No | 9.9 | 76.8 | 11.1 | 12.1 | 32.74 | 2.34 | C: 3.3% | C: 3.3% |
| 57 | 1 | Delhi | No | 9.1 | 65.7 | 5.1 | 29.3 | 14.33 | 10.83 | A: 0% | A2: 0% |
| 57 | 2 | Delhi | No | 10.8 | 62.5 | 2.1 | 35.4 | 53.17 | 3.55 | D: 9.6% | D: 9.6% |

**Supplementary Table 1 (cont’d)**

**Supplementary Table 1 (cont’d)**

| **ID**  **A** | **TT**  **B** | **State**  **C** | **Double**  **riskD** | **TLC**  **E** | **N**  **%F** | **M %G** | **L**  **%H** | **Ferritin I** | **CRP**  **J** | **Risk-**  **related classes**  **K** | **Final (five)**  **classes**  **L** |
| --- | --- | --- | --- | --- | --- | --- | --- | --- | --- | --- | --- |
| 58 | 1 | Delhi | No | 6.2 | 74.5 | 7.1 | 18.4 | 57.09 | 16.07 | B: 0% | B: 0% |
| 58 | 2 | Delhi | No | 13.5 | 85.9 | 5.1 | 9.1 | 23.17 | 3.74 | D: 9.6% | D: 9.6% |
| 59 | 1 | Delhi | No | 6.4 | 72.0 | 6.0 | 22.0 | 16.22 | 5.00 | D: 9.6% | D: 9.6% |
| 59 | 2 | Delhi | No | 10.6 | 74.7 | 5.1 | 20.2 | 24.91 | 13.04 | D: 9.6% | D: 9.6% |
| 60 | 1 | Delhi | No | 6.5 | 70.0 | 7.5 | 22.5 | 19.70 | 2.27 | D: 9.6% | D: 9.6% |
| 60 | 2 | Delhi | No | 6.9 | 83.0 | 3.0 | 14.0 | 26.17 | 7.04 | D: 9.6% | D: 9.6% |
| 61 | 1 | Delhi | No | 12.7 | 64.2 | 7.4 | 28.4 | 44.48 | 3.49 | D: 9.6% | D: 9.6% |
| 61 | 2 | Delhi | No | 15.0 | 79.8 | 3.0 | 17.2 | 44.04 | 10.53 | D: 9.6% | D: 9.6% |
| 62 | 1 | Delhi | Yes | 8.7 | 65.6 | 7.3 | 27.1 | 29.26 | 5.72 | D: 9.6% | D: 9.6% |
| 62 | 2 | Delhi | Yes | 9.2 | 78.8 | 5.1 | 16.2 | 57.09 | 3.80 | D: 9.6% | D: 9.6% |
| 63 | 1 | Delhi | No | 8.4 | 67.0 | 2.1 | 30.9 | * | * | A: 0% | A2: 0% |
| 63 | 2 | Delhi | No | 10.6 | 64.3 | 1.0 | 34.7 | * | * | C: 3.3% | C: 3.3% |
| 64 | 1 | Punjab | No | 7.7 | 75.8 | 6.1 | 18.2 | 4.87 | 2.26 | D: 9.6% | D: 9.6% |
| 64 | 2 | Punjab | No | 13.0 | 73.3 | 8.9 | 17.8 | 7.17 | 5.10 | D: 9.6% | D: 9.6% |
| 65 | 1 | Punjab | No | 11.0 | 78.2 | 1.1 | 20.7 | 16.61 | 0.36 | C: 3.3% | C: 3.3% |
| 65 | 2 | Punjab | No | 8.9 | 73.2 | 1.0 | 25.8 | 8.14 | 3.20 | C: 3.3% | C: 3.3% |
| 66 | 2 | Punjab | No | 8.8 | 71.4 | 4.1 | 24.5 | 9.22 | 3.90 | D: 9.6% | D: 9.6% |
| 67 | 2 | Punjab | No | 11.7 | 74.0 | 4.0 | 22.0 | 10.70 | 0.44 | D: 9.6% | D: 9.6% |
| 68 | 1 | Punjab | No | 8.6 | 62.8 | 3.2 | 34.0 | 31.83 | 1.44 | D: 9.6% | D: 9.6% |
| 68 | 2 | Punjab | No | 8.4 | 62.6 | 4.0 | 33.3 | 23.57 | 2.18 | D: 9.6% | D: 9.6% |
| 69 | 1 | Punjab | No | 9.2 | 71.4 | 3.1 | 25.5 | 30.30 | 0.55 | D: 9.6% | D: 9.6% |
| 69 | 2 | Punjab | No | 10.0 | 73.5 | 4.1 | 22.4 | 34.22 | 2.76 | D: 9.6% | D: 9.6% |
| 70 | 1 | Punjab | No | 8.3 | 76.0 | 4.0 | 20.0 | 7.26 | 0.95 | D: 9.6% | D: 9.6% |
| 70 | 2 | Punjab | No | 9.3 | 58.2 | 4.1 | 37.8 | 29.65 | 5.79 | D: 9.6% | D: 9.6% |
| 71 | 1 | Punjab | No | 10.2 | 71.4 | 4.1 | 24.5 | 8.13 | 1.30 | D: 9.6% | D: 9.6% |
| 71 | 2 | Punjab | No | 10.6 | 69.7 | 8.1 | 22.2 | 16.17 | 0.88 | D: 9.6% | D: 9.6% |
| 72 | 1 | Punjab | No | 9.0 | 73.1 | 1.1 | 25.8 | 13.14 | 0.36 | C: 3.3% | C: 3.3% |
| 72 | 2 | Punjab | No | 8.0 | 72.2 | 1.0 | 26.8 | 17.02 | 0.18 | C: 3.3% | C: 3.3% |
| 73 | 2 | Punjab | No | 8.0 | 63.0 | 3.0 | 34.0 | 10.54 | 3.64 | D: 9.6% | D: 9.6% |
| 74 | 1 | Punjab | No | 11.5 | 73.4 | 1.1 | 25.5 | 7.73 | 0.70 | C: 3.3% | C: 3.3% |
| 75 | 2 | Punjab | No | 7.3 | 73.7 | 3.2 | 23.2 | 19.30 | 8.63 | D: 9.6% | D: 9.6% |
| 76 | 1 | Punjab | No | 6.8 | 60.8 | 11.3 | 27.8 | 17.02 | 3.59 | A: 0% | A2: 0% |
| 76 | 2 | Punjab | No | 8.5 | 46.9 | 3.4 | 49.7 | 10.97 | 0.67 | D: 9.6% | D: 9.6% |
| 77 | 1 | Punjab | No | 8.4 | 65.0 | 9.0 | 26.0 | 19.12 | 0.75 | C: 3.3% | C: 3.3% |
| 77 | 2 | Punjab | No | 10.0 | 74.7 | 1.1 | 24.2 | 9.89 | 0.82 | D: 9.6% | D: 9.6% |
| 78 | 1 | Punjab | No | 7.0 | 69.1 | 1.1 | 29.8 | 10.43 | 4.48 | C: 3.3% | C: 3.3% |
| 78 | 2 | Punjab | No | 9.3 | 76.0 | 6.0 | 18.0 | 11.46 | 8.32 | D: 9.6% | D: 9.6% |
| 79 | 1 | Punjab | No | 5.8 | 71.3 | 1.1 | 27.7 | 6.92 | 2.42 | C: 3.3% | C: 3.3% |
| 80 | 2 | Punjab | No | 10.7 | 71.6 | 1.1 | 27.4 | 3.87 | 0.60 | C: 3.3% | C: 3.3% |
| 81 | 2 | Punjab | No | 8.9 | 75.8 | 1.1 | 23.2 | 15.44 | 0.91 | C: 3.3% | C: 3.3% |
| 82 | 1 | Punjab | No | 8.0 | 71.6 | 0.9 | 27.5 | 14.76 | 0.88 | C: 3.3% | C: 3.3% |
| 83 | 1 | Punjab | No | 8.1 | 74.7 | 1.1 | 24.2 | 6.65 | 0.25 | C: 3.3% | C: 3.3% |
| 84 | 2 | Punjab | No | 8.8 | 76.9 | 2.2 | 20.9 | 12.81 | 0.04 | C: 3.3% | C: 3.3% |

**Supplementary Table 1 (cont’d)**

| **ID**  **A** | **TT**  **B** | **State**  **C** | **Double**  **riskD** | **TLC**  **E** | **N**  **%F** | **M %G** | **L**  **%H** | **Ferritin I** | **CRP**  **J** | **Risk-**  **related classes**  **K** | **Final (five)**  **classes**  **L** |
| --- | --- | --- | --- | --- | --- | --- | --- | --- | --- | --- | --- |
| 85 | 2 | Punjab | No | 7.8 | 75.0 | 2.1 | 22.9 | 16.67 | 2.71 | C: 3.3% | C: 3.3% |
| 86 | 2 | Punjab | No | 9.6 | 71.6 | 2.1 | 26.3 | 10.25 | 0.84 | C: 3.3% | C: 3.3% |
| 87 | 1 | Punjab | No | 6.8 | 72.7 | 2.0 | 25.3 | 13.07 | 0.20 | C: 3.3% | C: 3.3% |
| 88 | 1 | Punjab | No | 7.3 | 65.3 | 8.2 | 26.5 | 26.34 | 3.69 | D: 9.6% | D: 9.6% |
| 89 | 1 | Punjab | No | 6.6 | 62.2 | 2.0 | 35.7 | 13.86 | 0.44 | D: 9.6% | D: 9.6% |
| 89 | 2 | Punjab | No | 5.1 | 70.5 | 2.1 | 27.4 | 14.21 | 0.67 | D: 9.6% | D: 9.6% |
| 90 | 1 | Punjab | No | 8.4 | 71.7 | 1.0 | 27.3 | 12.51 | 1.11 | C: 3.3% | C: 3.3% |
| 90 | 2 | Punjab | No | 8.8 | 72.3 | 5.9 | 21.8 | 10.72 | 0.57 | D: 9.6% | D: 9.6% |
| 91 | 2 | Punjab | No | 9.0 | 71.3 | 1.1 | 27.7 | 19.10 | 4.50 | C: 3.3% | C: 3.3% |
| 92 | 1 | Punjab | No | 6.7 | 72.6 | 1.1 | 26.3 | 9.51 | 2.89 | C: 3.3% | C: 3.3% |
| 92 | 2 | Punjab | No | 7.7 | 78.8 | 7.1 | 14.1 | 32.76 | 3.43 | D: 9.6% | D: 9.6% |
| 93 | 2 | Punjab | No | 10.0 | 80.6 | 2.2 | 17.2 | 15.52 | 1.46 | C: 3.3% | C: 3.3% |
| 94 | 2 | Punjab | No | 8.8 | 71.7 | 2.0 | 26.3 | 26.90 | 0.03 | C: 3.3% | C: 3.3% |
| 95 | 1 | Punjab | No | 6.1 | 67.3 | 2.0 | 30.6 | 25.34 | 2.70 | C: 3.3% | C: 3.3% |
| 95 | 2 | Punjab | No | 7.8 | 76.8 | 1.0 | 22.2 | 26.83 | 0.50 | D: 9.6% | D: 9.6% |
| 96 | 2 | Punjab | No | 9.9 | 71.7 | 2.0 | 26.3 | 10.60 | 10.06 | C: 3.3% | C: 3.3% |
| 97 | 1 | Punjab | No | 7.1 | 69.5 | 1.1 | 29.5 | 27.48 | 1.57 | C: 3.3% | C: 3.3% |
| 98 | 1 | Punjab | Yes | 6.0 | 69.1 | 4.3 | 26.6 | 6.17 | 1.07 | D: 9.6% | D: 9.6% |
| 98 | 2 | Punjab | Yes | 10.0 | 83.0 | 3.2 | 13.8 | 15.42 | 2.68 | D: 9.6% | D: 9.6% |
| 99 | 1 | Punjab | No | 9.8 | 72.7 | 2.0 | 25.3 | 12.91 | 1.31 | C: 3.3% | C: 3.3% |
| 99 | 2 | Punjab | No | 15.0 | 80.8 | 3.0 | 16.2 | 7.48 | 1.72 | D: 9.6% | D: 9.6% |
| 100 | 2 | Punjab | No | 6.9 | 65.6 | 2.1 | 32.3 | 10.09 | 8.32 | C: 3.3% | C: 3.3% |
| 101 | 1 | Punjab | Yes | 7.8 | 71.4 | 3.1 | 25.5 | 27.48 | 0.94 | D: 9.6% | D: 9.6% |
| 102 | 1 | Punjab | No | 9.9 | 81.0 | 5.0 | 14.0 | 11.61 | 0.67 | D: 9.6% | D: 9.6% |
| 102 | 2 | Punjab | No | 6.7 | 60.8 | 6.2 | 33.0 | 20.25 | 0.98 | D: 9.6% | D: 9.6% |
| 103 | 1 | Punjab | No | 7.3 | 55.9 | 5.9 | 38.2 | 8.35 | 3.13 | C: 3.3% | C: 3.3% |
| 103 | 2 | Punjab | No | 10.0 | 75.5 | 2.0 | 22.4 | 7.04 | 1.31 | D: 9.6% | D: 9.6% |
| 104 | 1 | Punjab | No | 9.9 | 63.3 | 6.1 | 30.6 | 6.61 | 7.06 | C: 3.3% | C: 3.3% |
| 104 | 2 | Punjab | No | 12.6 | 66.7 | 2.0 | 31.3 | 8.13 | 3.02 | D: 9.6% | D: 9.6% |
| 105 | 1 | Punjab | No | 5.8 | 67.7 | 2.0 | 30.3 | 2.93 | 0.65 | C: 3.3% | C: 3.3% |
| 105 | 2 | Punjab | No | 7.0 | 61.2 | 5.1 | 33.7 | 23.57 | 6.34 | D: 9.6% | D: 9.6% |
| 106 | 1 | Punjab | No | 9.9 | 71.4 | 3.1 | 25.5 | 21.17 | 1.16 | A: 0% | A2: 0% |
| 106 | 2 | Punjab | No | 11.6 | 64.6 | 2.1 | 33.3 | 17.48 | 2.06 | D: 9.6% | D: 9.6% |
| 107 | 1 | Punjab | No | 8.9 | 68.4 | 7.1 | 24.5 | 15.30 | 2.05 | D: 9.6% | D: 9.6% |
| 108 | 1 | Punjab | No | 7.1 | 67.3 | 4.1 | 28.6 | 21.17 | 1.16 | C: 3.3% | C: 3.3% |
| 108 | 2 | Punjab | No | 9.7 | 76.6 | 2.1 | 21.3 | 27.26 | 3.16 | D: 9.6% | D: 9.6% |
| 109 | 2 | Punjab | No | 7.8 | 66.3 | 4.8 | 28.8 | 15.30 | 3.71 | D: 9.6% | D: 9.6% |
| 110 | 1 | Punjab | No | 7.4 | 61.2 | 6.1 | 32.7 | 10.64 | 1.29 | C: 3.3% | C: 3.3% |
| 110 | 2 | Punjab | No | 9.9 | 67.7 | 1.0 | 31.3 | 19.62 | 0.96 | D: 9.6% | D: 9.6% |
| 111 | 2 | Punjab | No | 7.2 | 77.6 | 1.0 | 21.4 | 26.34 | 0.55 | C: 3.3% | C: 3.3% |
| 112 | 1 | Punjab | No | 9.2 | 74.0 | 1.0 | 25.0 | 13.41 | 1.69 | C: 3.3% | C: 3.3% |
| 113 | 2 | Punjab | No | 13.5 | 87.6 | 1.0 | 11.3 | 16.46 | 3.23 | B: 0% | B: 0% |
| 114 | 1 | Punjab | No | 7.1 | 72.7 | 1.0 | 26.3 | 12.86 | 1.13 | C: 3.3% | C: 3.3% |

**Supplementary Table 1 (cont’d)**

| **ID**  **A** | **TT**  **B** | **State**  **C** | **Double**  **riskD** | **TLC**  **E** | **N**  **%F** | **M %G** | **L**  **%H** | **Ferritin I** | **CRP**  **J** | **Risk-**  **related classes**  **K** | **Final (five)**  **classes**  **L** |
| --- | --- | --- | --- | --- | --- | --- | --- | --- | --- | --- | --- |
| 114 | 2 | Punjab | No | 9.1 | 70.7 | 4.0 | 25.3 | 30.69 | 0.20 | D: 9.6% | D: 9.6% |
| 115 | 2 | Punjab | No | 10.6 | 82.8 | 2.0 | 15.2 | 28.50 | 1.62 | C: 3.3% | C: 3.3% |
| 116 | 2 | Punjab | No | 5.5 | 72.9 | 1.0 | 26.0 | 12.57 | 0.82 | C: 3.3% | C: 3.3% |
| 117 | 1 | Punjab | No | 5.3 | 69.4 | 4.1 | 26.5 | 12.57 | 0.82 | C: 3.3% | C: 3.3% |
| 117 | 2 | Punjab | No | 5.0 | 72.3 | 2.1 | 25.5 | 20.97 | 0.22 | D: 9.6% | D: 9.6% |
| 118 | 1 | Punjab | No | 7.7 | 74.5 | 5.1 | 20.4 | 16.38 | 0.78 | D: 9.6% | D: 9.6% |
| 119 | 2 | Punjab | No | 9.0 | 73.2 | 2.1 | 24.7 | 12.76 | 0.78 | C: 3.3% | C: 3.3% |
| 120 | 1 | Punjab | No | 8.8 | 81.1 | 1.1 | 17.9 | 13.41 | 0.42 | C: 3.3% | C: 3.3% |
| 121 | 1 | Punjab | No | 10.8 | 76.1 | 1.1 | 22.8 | 27.46 | 0.33 | C: 3.3% | C: 3.3% |
| 122 | 1 | Punjab | No | 8.3 | 75.5 | 4.3 | 20.2 | 10.16 | 1.11 | D: 9.6% | D: 9.6% |
| 123 | 1 | Punjab | No | 7.9 | 69.1 | 2.1 | 28.9 | 14.76 | 0.55 | C: 3.3% | C: 3.3% |
| 124 | 1 | Punjab | No | 6.0 | 46.4 | 2.1 | 51.5 | 13.14 | 0.62 | A: 0% | A2: 0% |
| 124 | 2 | Punjab | No | 6.3 | 71.4 | 4.1 | 24.5 | 15.12 | 0.50 | D: 9.6% | D: 9.6% |
| 125 | 2 | Punjab | No | 9.5 | 71.9 | 1.0 | 27.1 | 9.30 | 6.65 | C: 3.3% | C: 3.3% |
| 126 | 1 | Punjab | No | 6.0 | 72.6 | 1.1 | 26.3 | 13.95 | 1.12 | C: 3.3% | C: 3.3% |
| 127 | 1 | Punjab | No | 7.7 | 80.9 | 2.2 | 16.9 | 10.90 | 0.44 | C: 3.3% | C: 3.3% |
| 127 | 2 | Punjab | No | 8.1 | 78.3 | 2.2 | 19.6 | 18.20 | 0.79 | C: 3.3% | C: 3.3% |
| 128 | 1 | Punjab | No | 7.0 | 72.4 | 1.0 | 26.5 | 24.57 | 0.39 | C: 3.3% | C: 3.3% |
| 128 | 2 | Punjab | No | 10.6 | 76.6 | 1.1 | 22.3 | 10.45 | 0.13 | C: 3.3% | C: 3.3% |
| 129 | 2 | Punjab | No | 8.0 | 80.8 | 1.0 | 18.2 | 20.09 | 1.30 | C: 3.3% | C: 3.3% |
| 130 | 1 | Punjab | No | 9.2 | 71.4 | 1.0 | 27.6 | 6.61 | 0.40 | C: 3.3% | C: 3.3% |
| 130 | 2 | Punjab | No | 10.1 | 72.7 | 3.0 | 24.2 | 15.89 | 0.56 | D: 9.6% | D: 9.6% |
| 131 | 2 | Punjab | No | 9.2 | 72.0 | 3.0 | 25.0 | 17.62 | 4.80 | D: 9.6% | D: 9.6% |

**Glossary**

A: Individual (anonymized) identification number

B: Temporal test (TT)

C: State

D: Double risk (low birth weight and pre-term birth)

E: Total leukocyte count (cells/µL)

F: Neutrophil %

G: Monocyte %

H: Lymphocyte %

I: Ferritin (μg/L)

J: CRP (μg/L)

K: computer-derived data partitioning (presumptively, inflammation-related classes, first step): A: no inflammation; B: early inflammation; C: late inflammation under recovery; D: late inflammation under chronicity). Numbers indicate the percentage of each data class associated with double risks (e.g., 9.6% of all double risks were classified within class ‘D’).

L: computer-derived data partitioning (presumptively, inflammation-related classes, second step): former class A observations are split into two (A1 and A2) subsets (both with 0% double risks).
